# Supplementary material for: Employing a cluster transfer strategy in a hybridisation chain reaction–silver nanocluster hybrid sensor for nucleic acid detection
Source: Royal Society of Chemistry journal article supplement (doi:10.1039/d5ay01362c), 2026-01-01
Supplement: d5ay01362c1.pdf [file d5ay01362c1.pdf]

## SUPPLEMENTARY INFORMATION

### Employing Cluster Transfer Strategy in Hybridisation Chain Reaction-Silver Nanoclusters Hybrid Sensor for Nucleic Acid Detection

Siu Yee New,<sup>\*a</sup> Nathaniel Jia Yoong Chan<sup>a</sup> and Jessica Sui Ying Ooi<sup>a</sup>

<sup>a</sup> School of Pharmacy, Faculty of Science and Engineering, University of Nottingham Malaysia, Semenyih, Selangor Darul Ehsan, Malaysia. Email: [SiuYee.New@nottingham.edu.my](mailto:SiuYee.New@nottingham.edu.my)

**Table S1.** Comparison of our HCR-AgNCs biosensor with other reported nucleic acid biosensors.

| Study              | Target                        | Design Feature                                                    | LOD                           | Ref           |
|--------------------|-------------------------------|-------------------------------------------------------------------|-------------------------------|---------------|
| Zhang et al., 2024 | Synthetic DNA                 | Bifunctional blocker-aided HCR with ratiometric AgNCs             | 1 pM                          | <sup>4</sup>  |
| Xia et al., 2023   | - Synthetic DNA<br>- miRNA-21 | Integrates HCR with electrochemical detection.                    | DNA: 0.6 fM<br>miRNA-21: 1 fM | <sup>14</sup> |
| Ooi et al., 2025   | Synthetic DNA                 | Label-free HCR-AgNCs biosensor with universal hairpins            | 41 nM                         | <sup>15</sup> |
| Wang et al., 2025  | miRNA-133a                    | DNA triangular prism + HCR + electrochemical signal amplification | 2.21 aM                       | <sup>16</sup> |
| Current work       | Synthetic DNA                 | HCR with transferable AgNCs                                       | 46 nM                         |               |

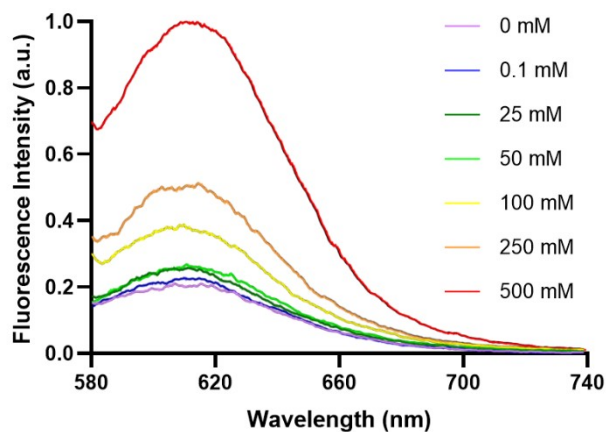

**Fig. S1.** Fluorescence emission spectra of the HCR-AgNCs sensor at varying DNA-141 concentrations (0–500 mM).
